# Supplementary material for: Increased levels of midbrain immune-related transcripts in schizophrenia and in murine offspring after maternal immune activation
Source: PubMed Central journal article supplement (PMC7910216; doi:10.1038/s41380-019-0434-0), 2019-06-05

# Supplementary Figure 4

## Human

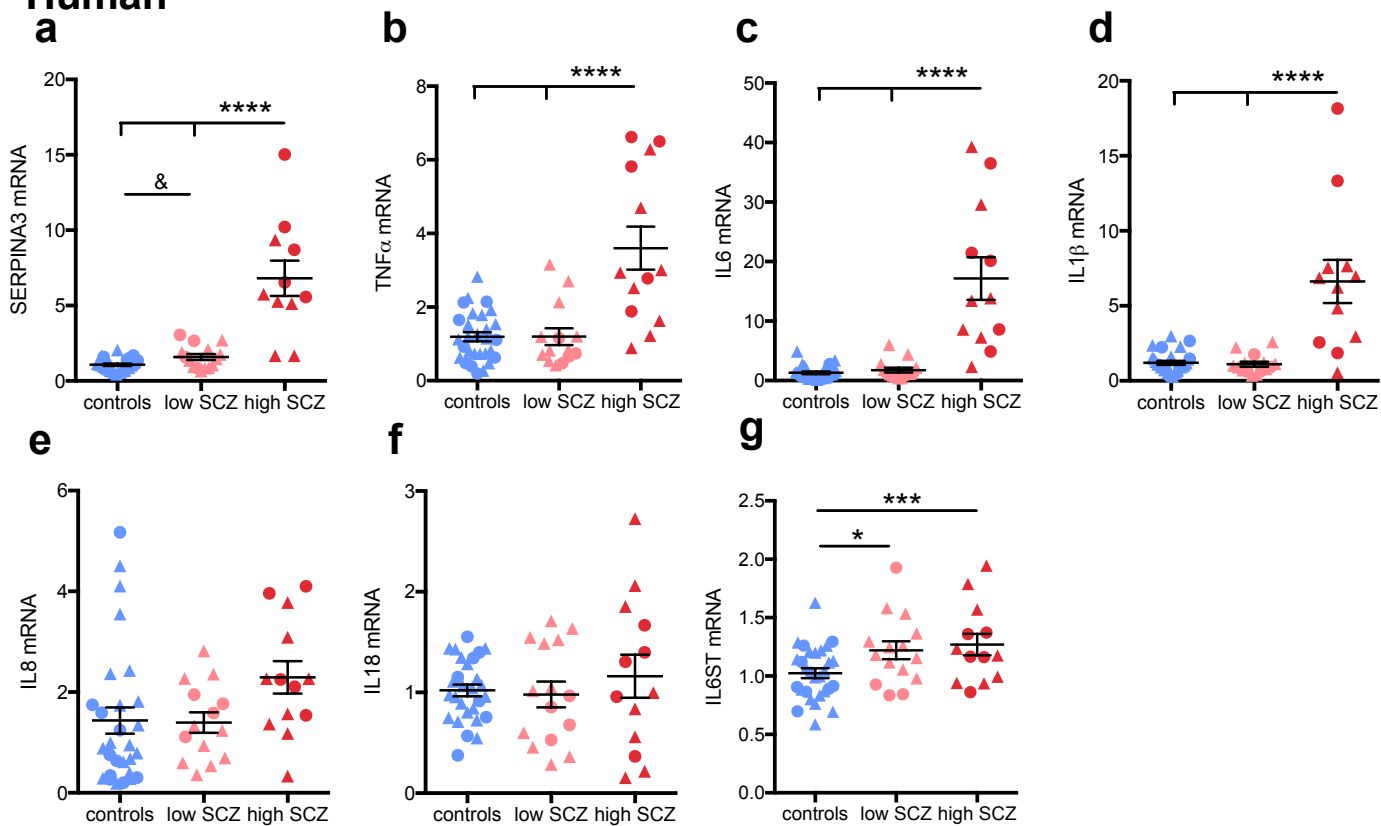

## Mouse

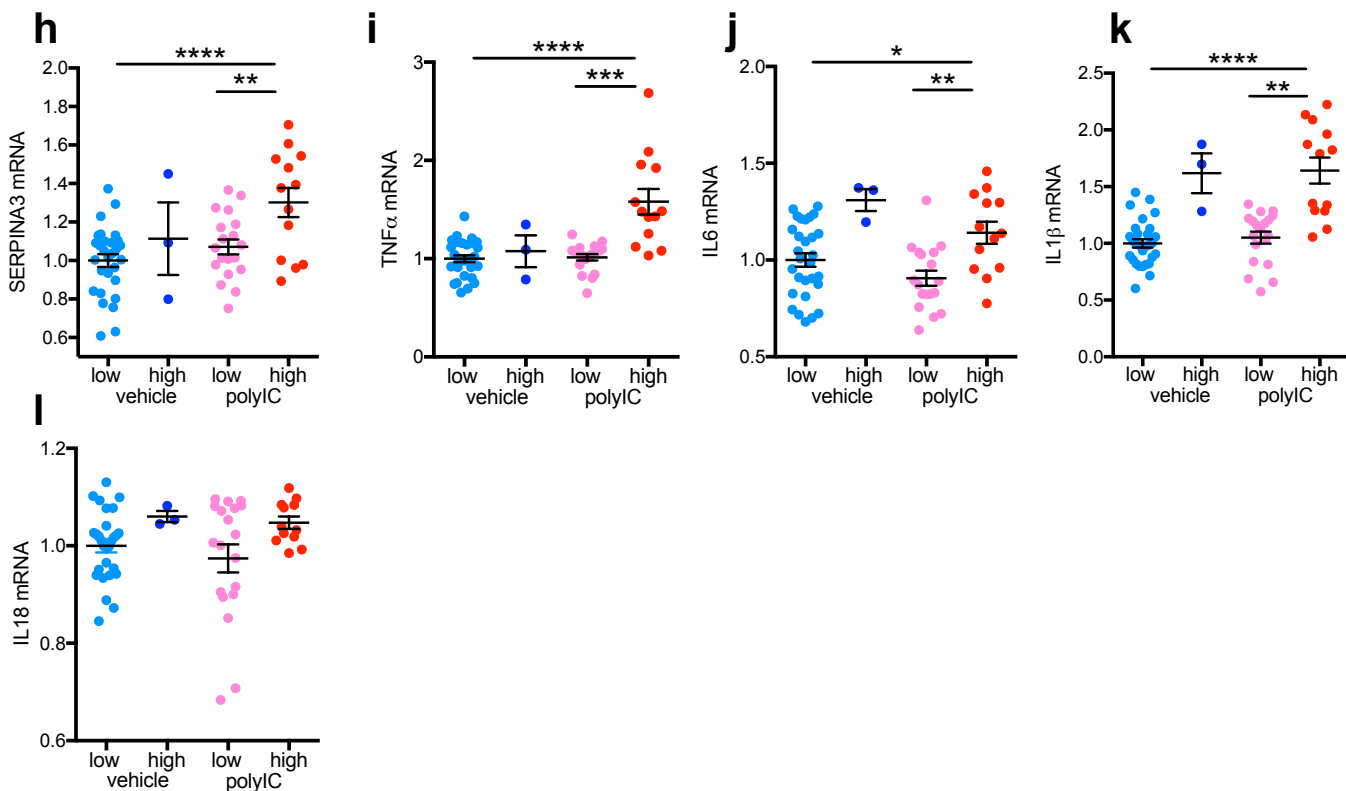

Supplement: 41380_2019_434_MOESM6_ESM.pdf [file 41380_2019_434_MOESM6_ESM.pdf]
